# Supplementary material for: Essential role for paxillin tyrosine phosphorylation in LPS-induced mitochondrial fission, ROS generation and lung endothelial barrier loss
Source: PubMed Central journal article supplement (PMC8413352; doi:10.1038/s41598-021-97006-y), 2021-09-02

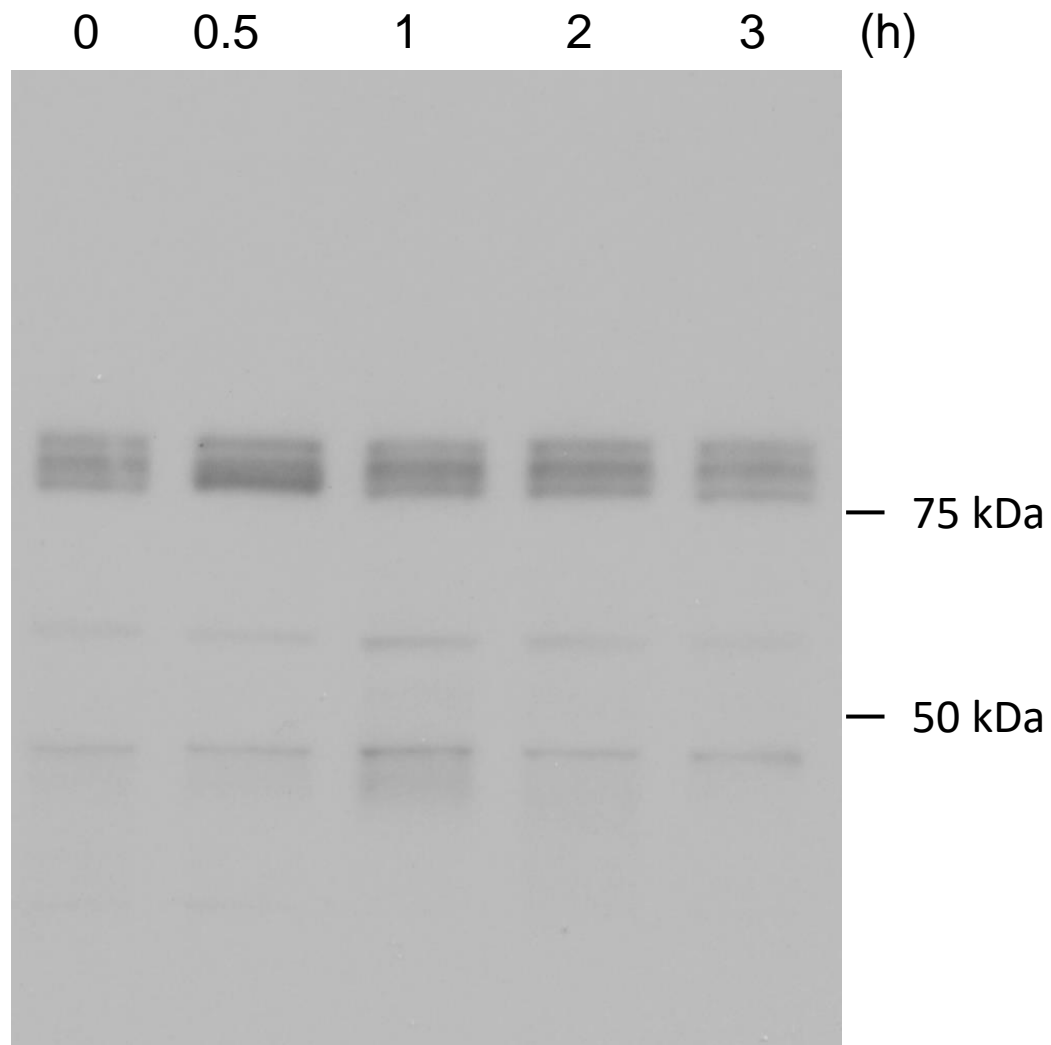

**Fig4A p-Drp1 (Ser 616)**

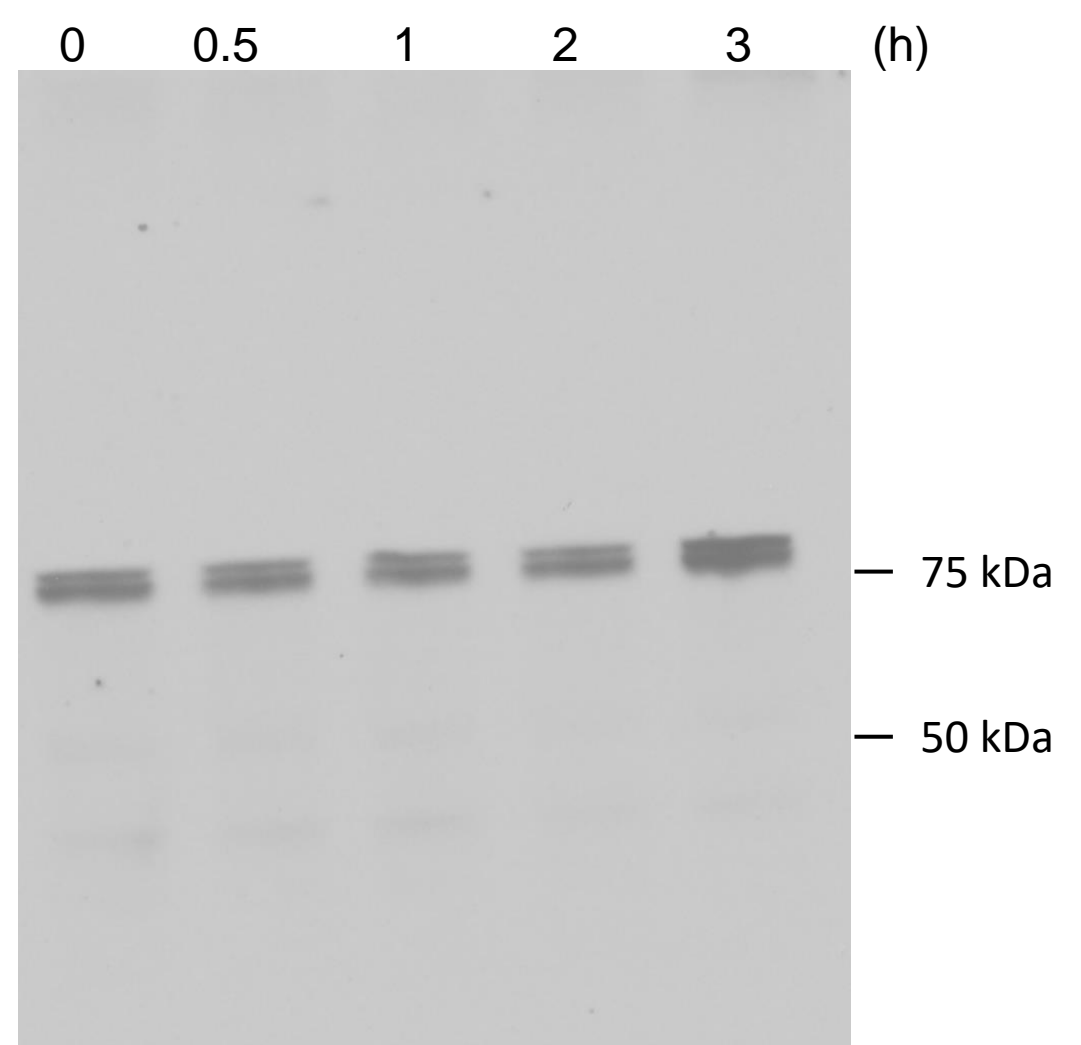

**Fig4A Drp1**

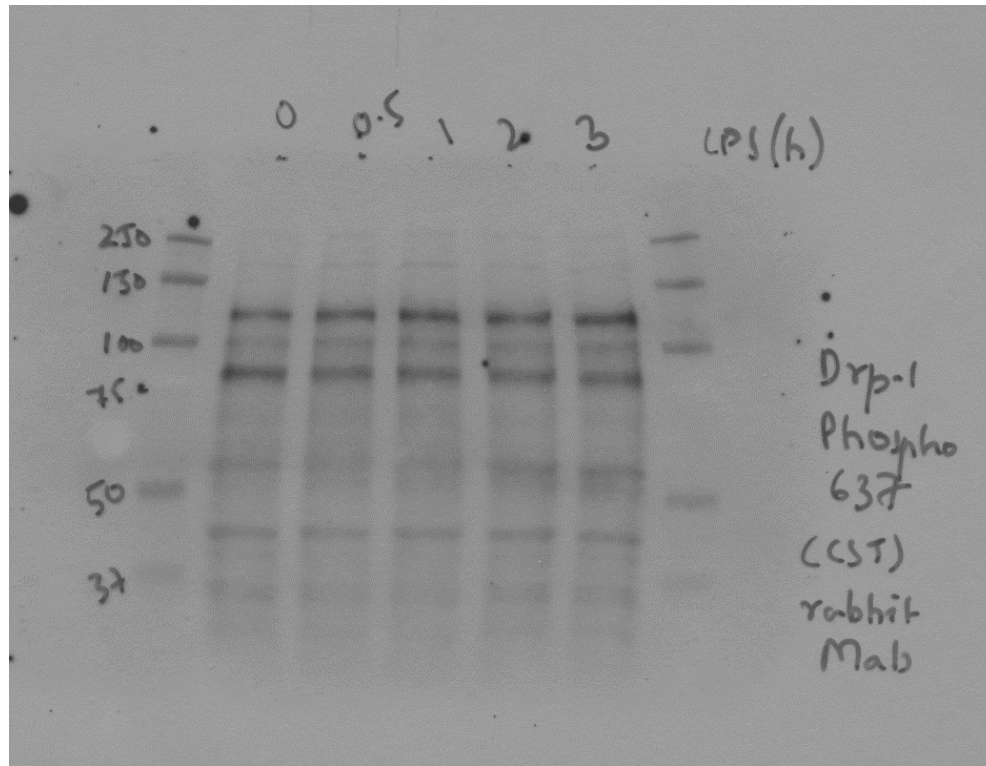

Fig 4A p-Drp1(Ser 637)

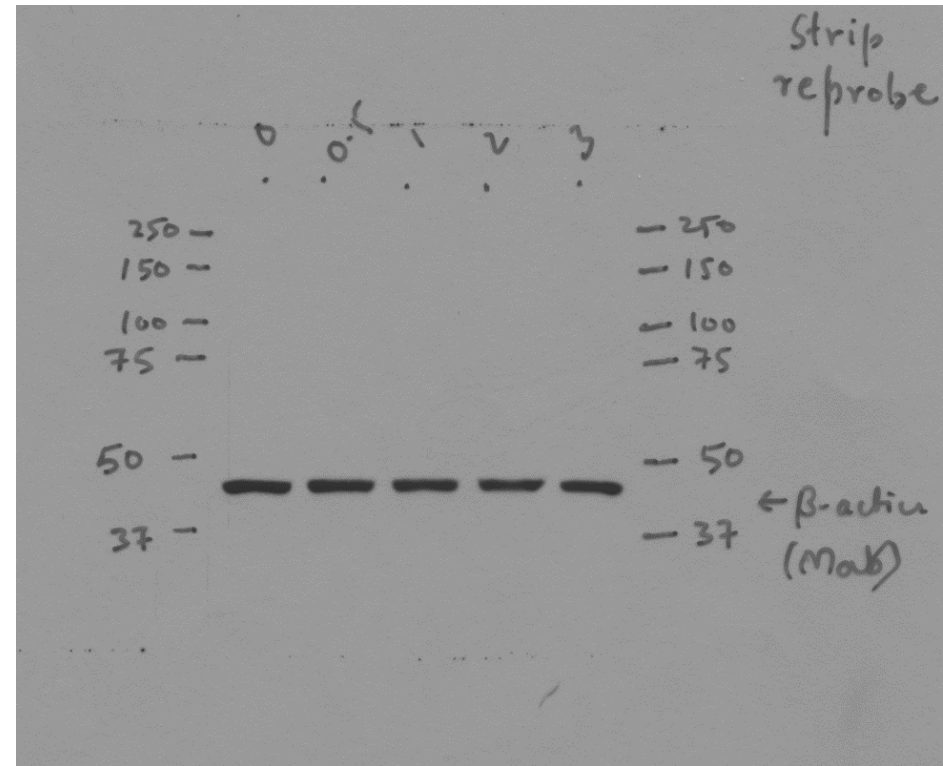

4A actin

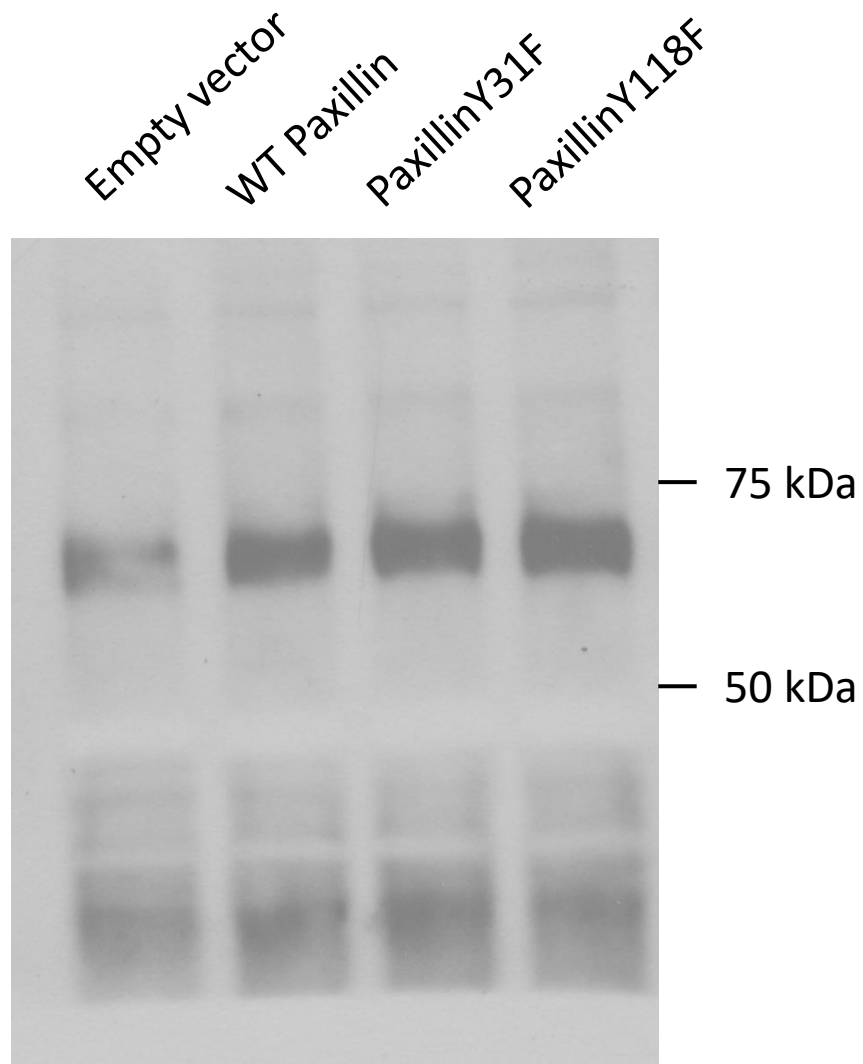

**Fig4C Paxillin**

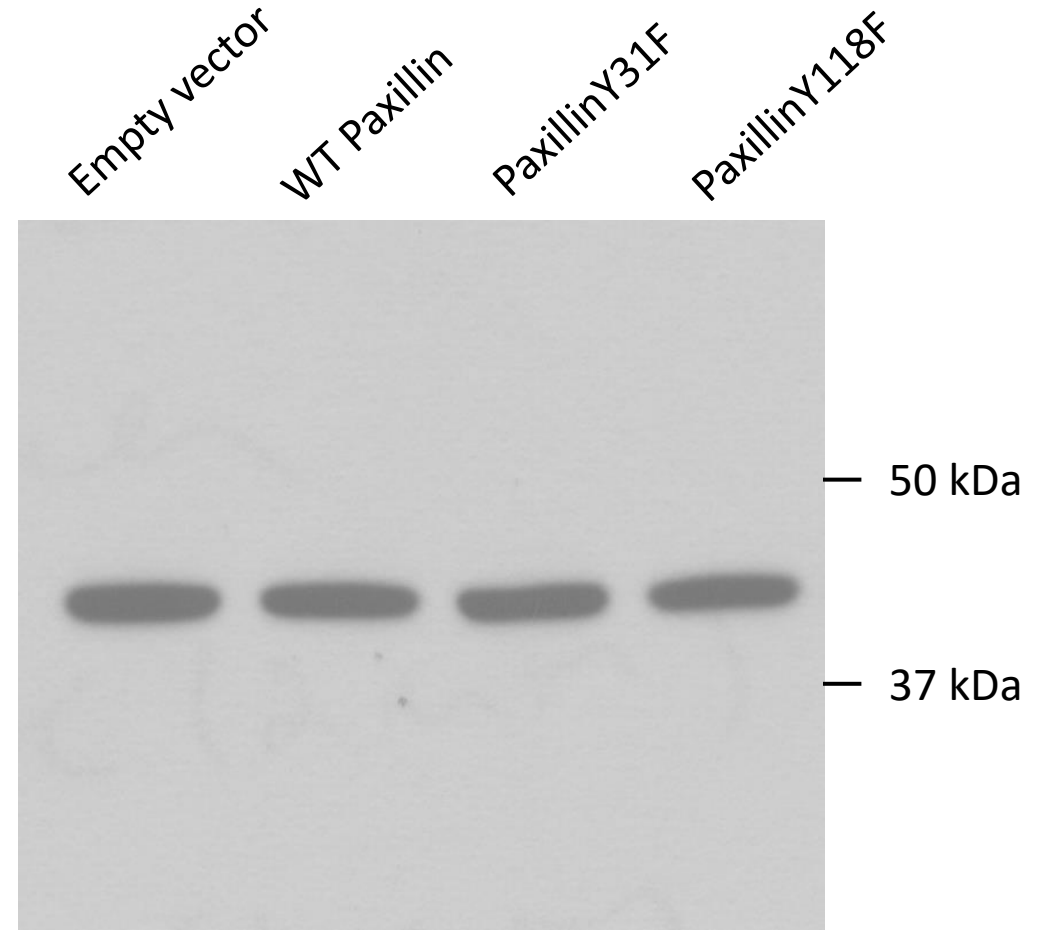

**Fig 4C Actin**

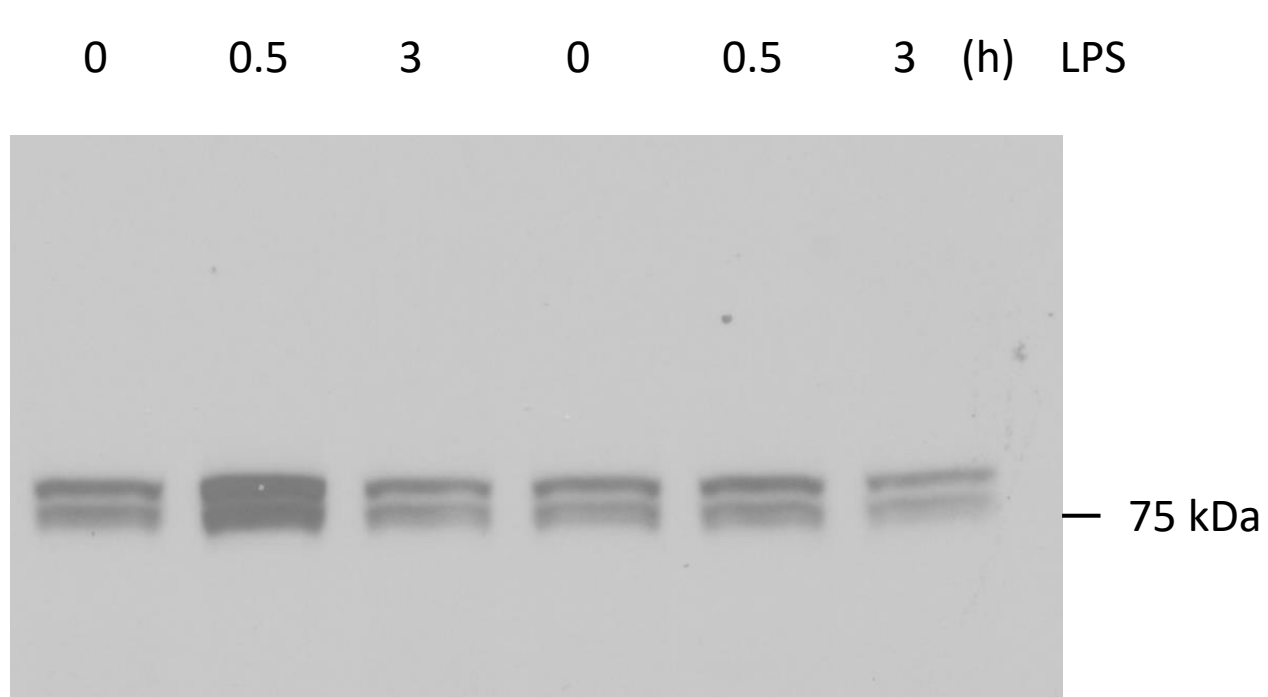

**Fig 4E p-Drp1 (Ser616)**

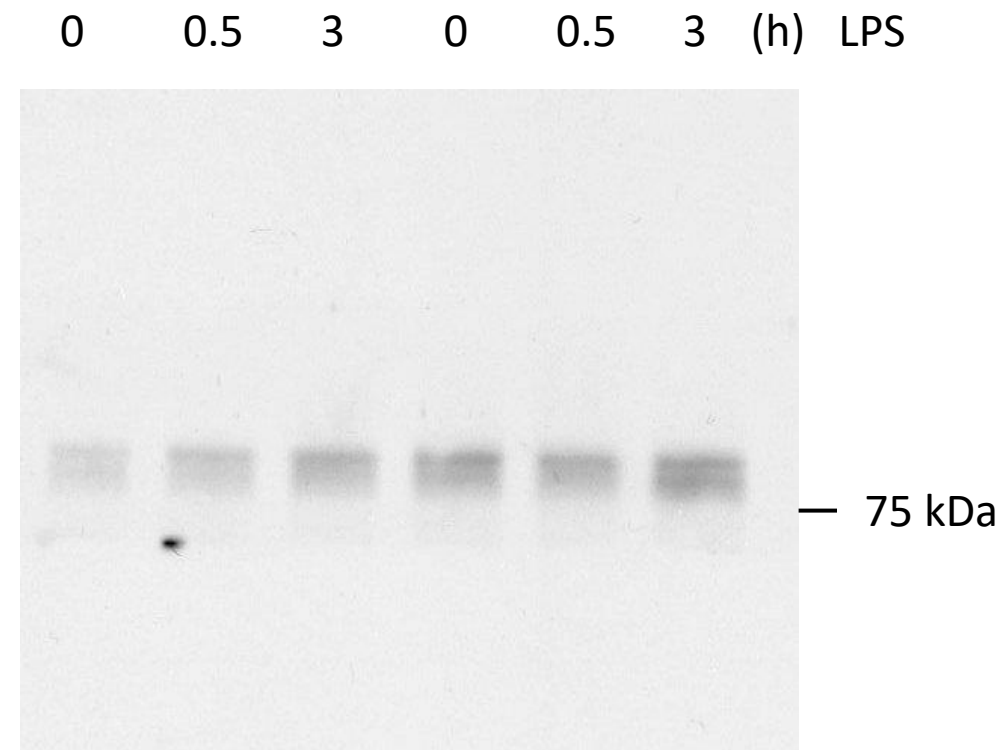

**Fig 4E Drp1**

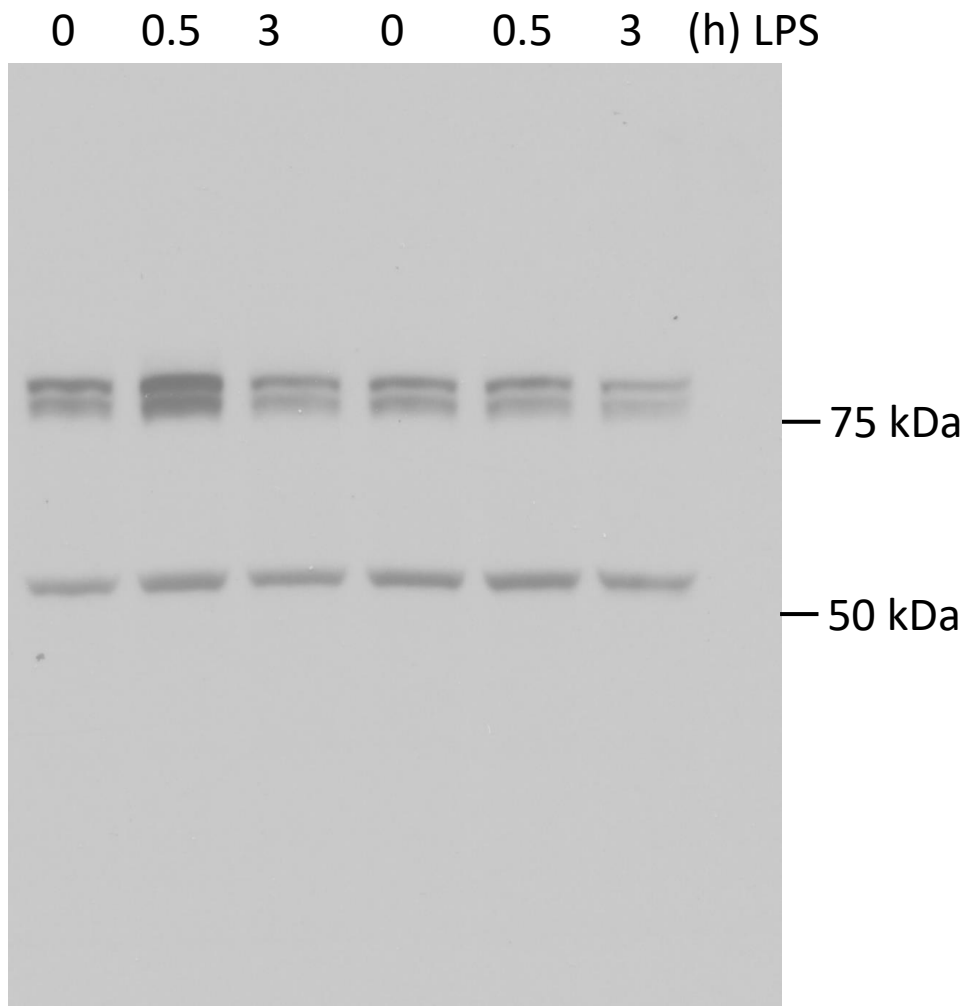

**Fig 4G p-Drp1 (Ser616)**

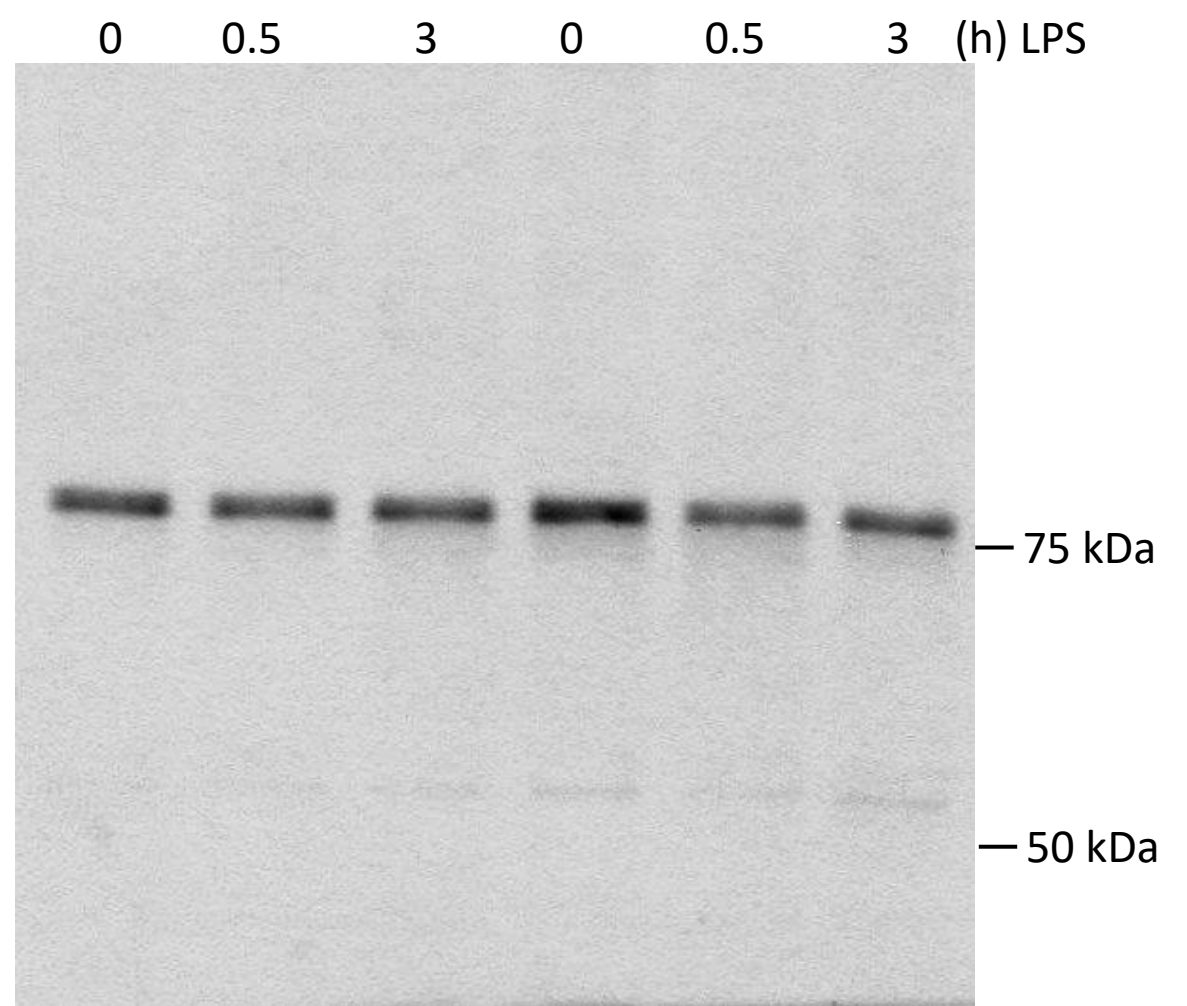

**Fig 4G Drp1**

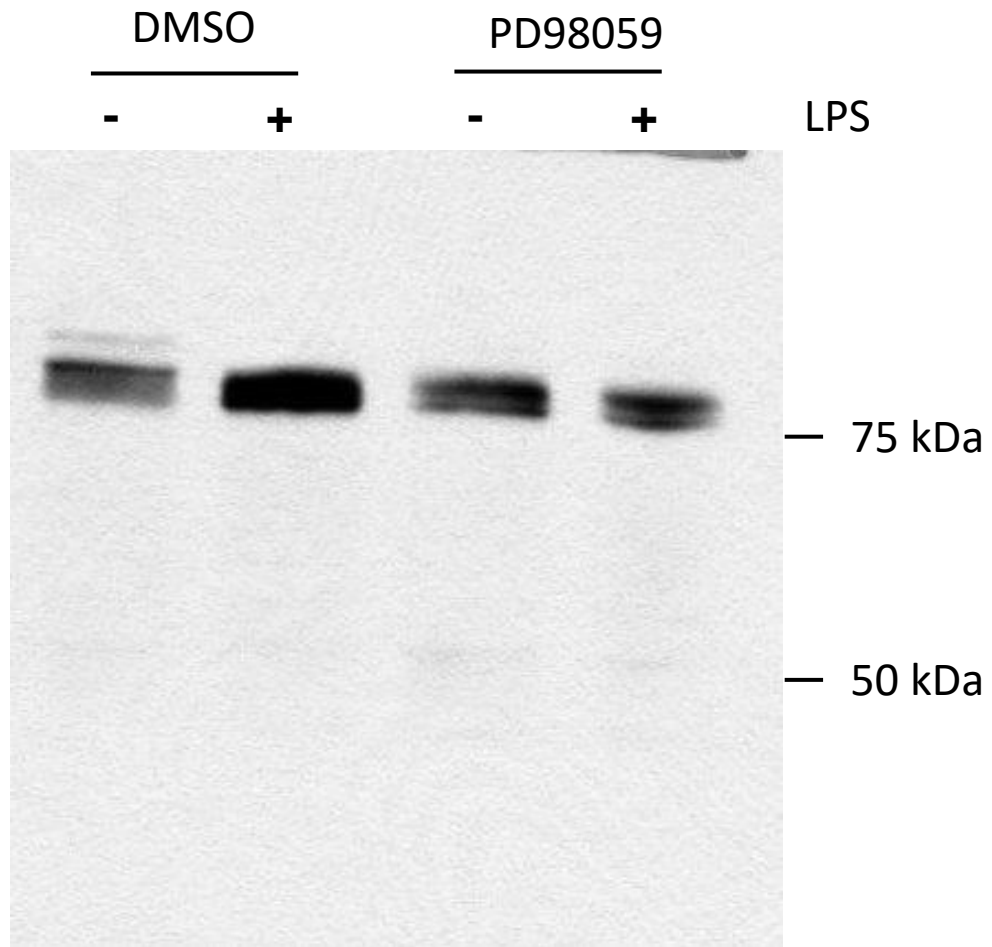

**Fig 6A p-Drp1 (Ser616)**

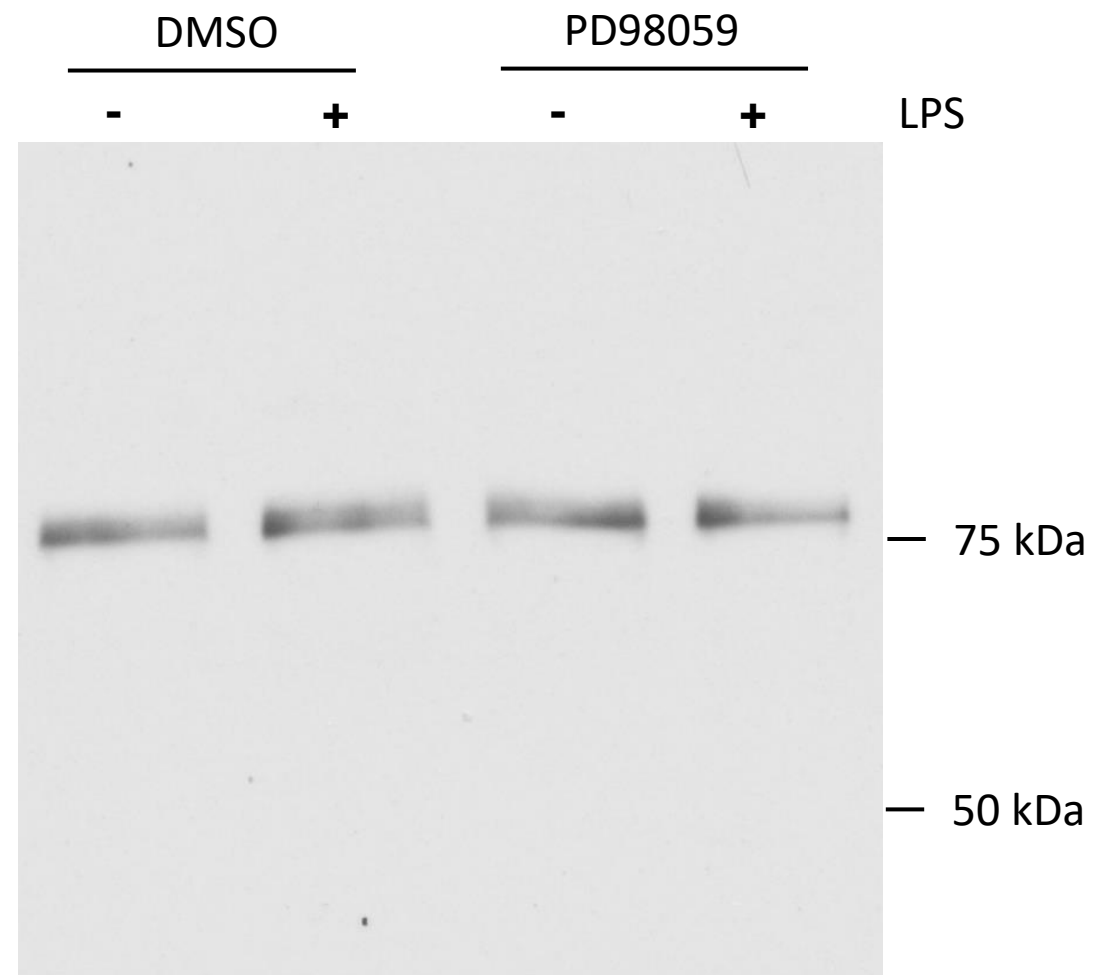

**Fig 6A Drp1**

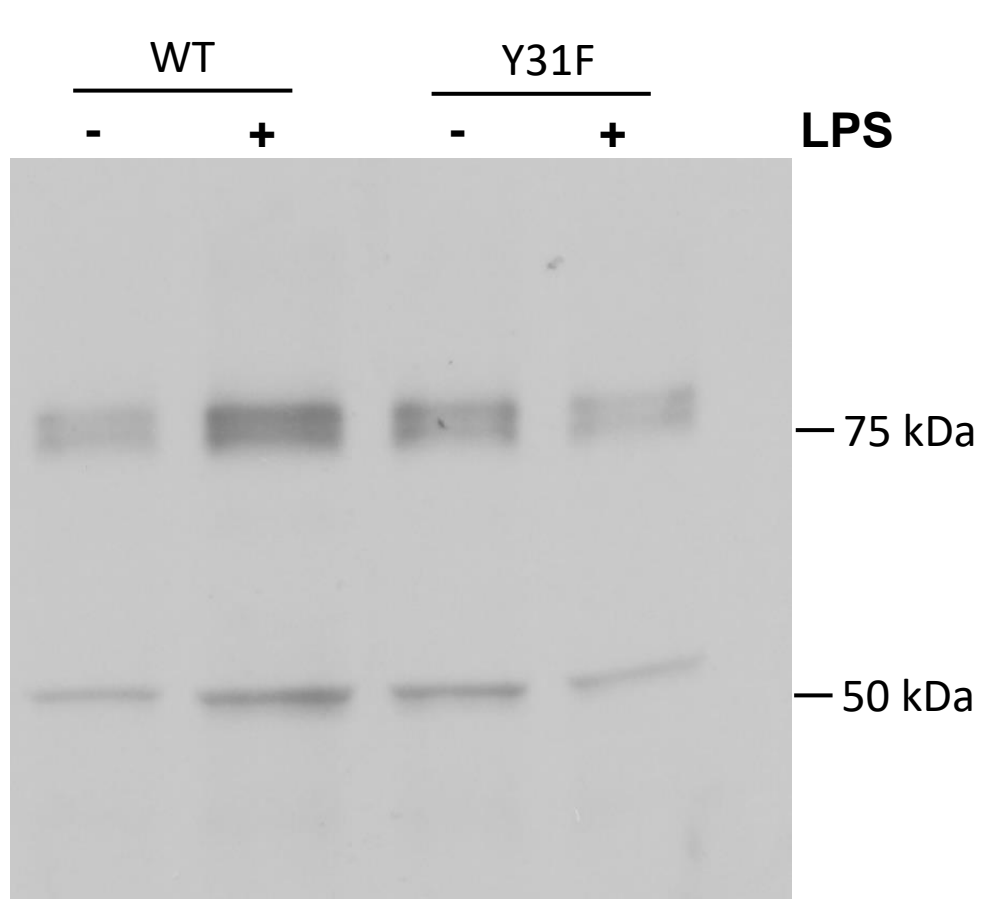

**Fig 7A Drp1 (Ser616)**

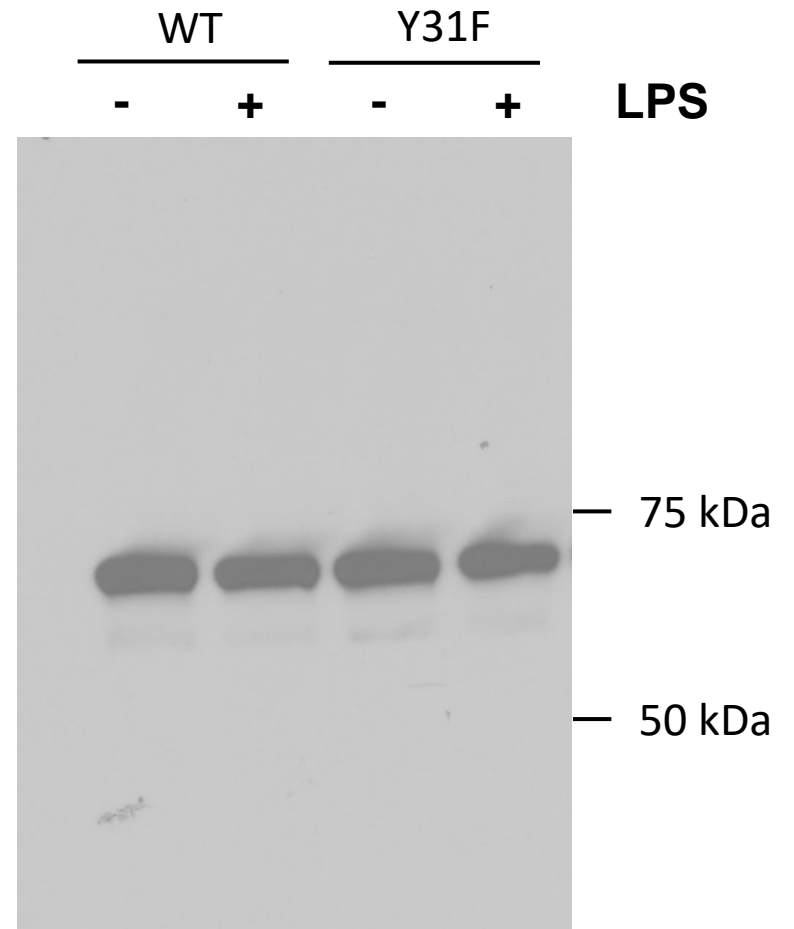

**Fig 7A Pax**

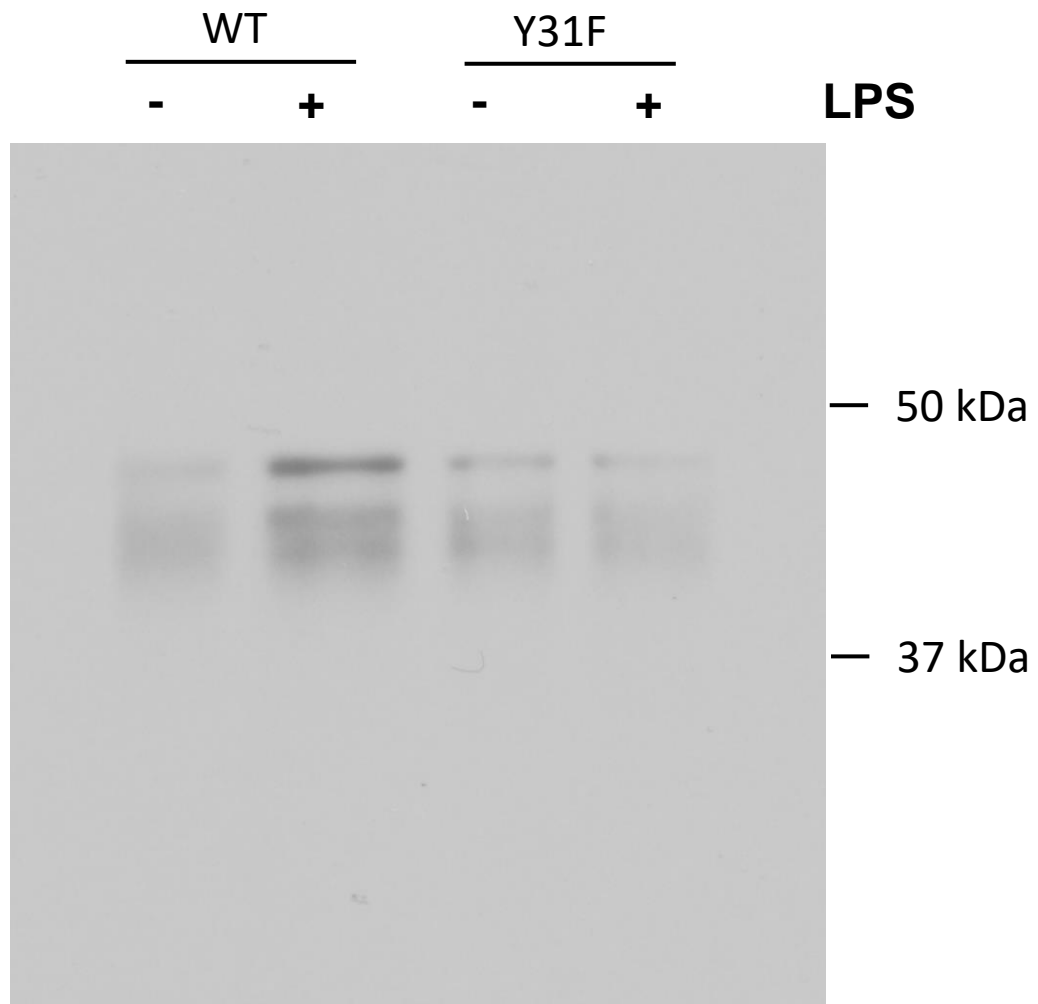

**Fig7C Erk1/2**

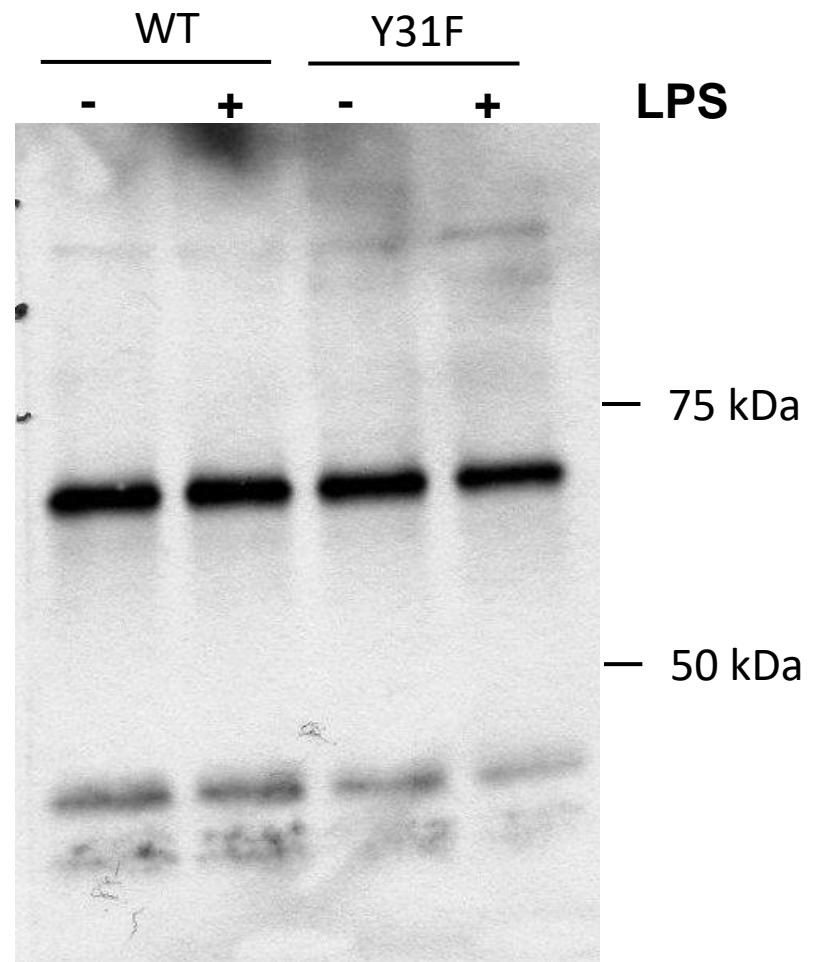

**7C Paxillin**



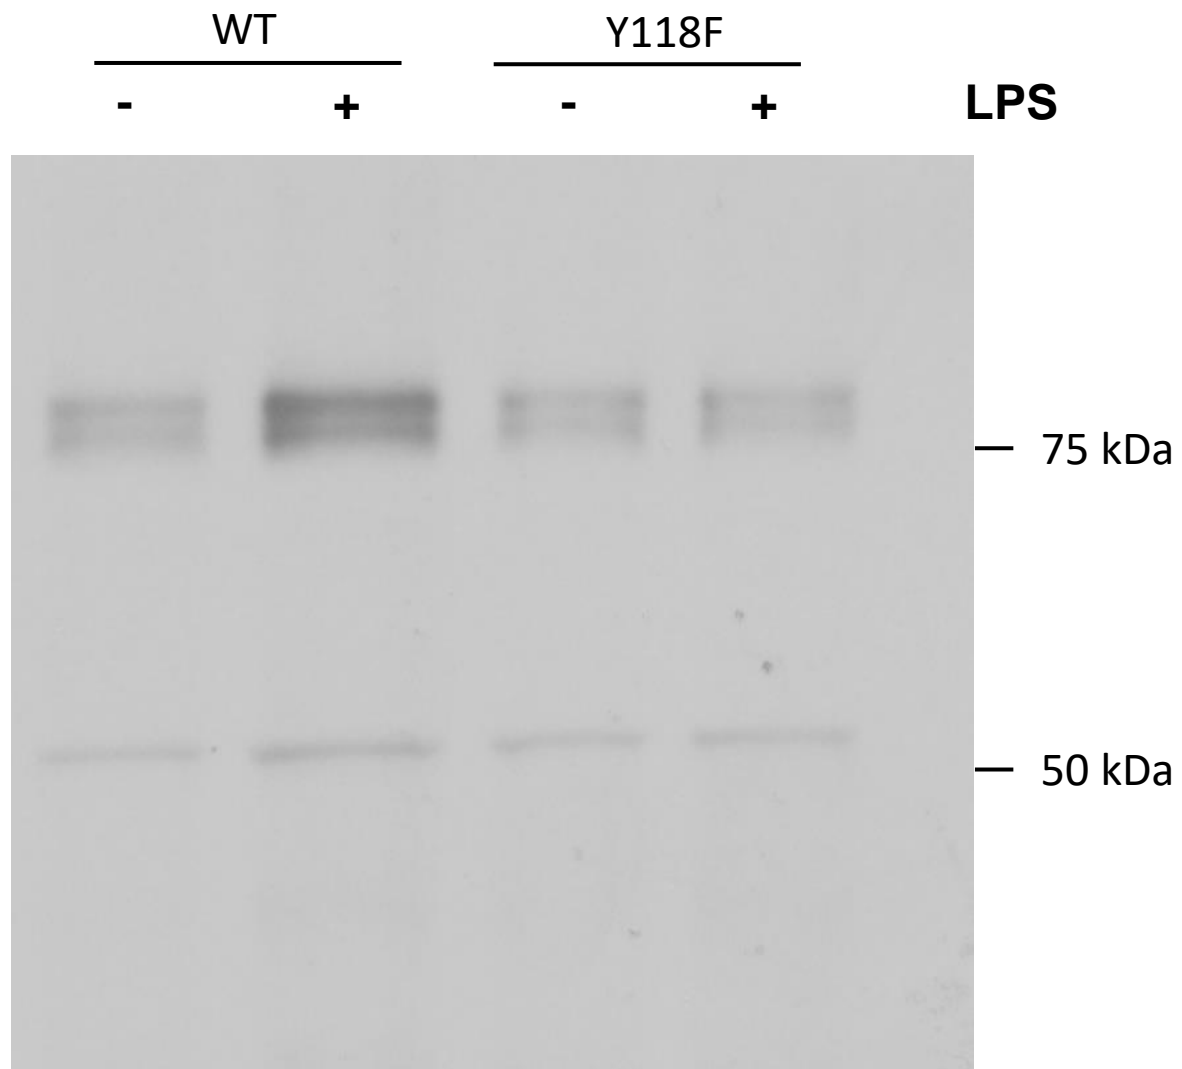

**Fig7E Drp1**

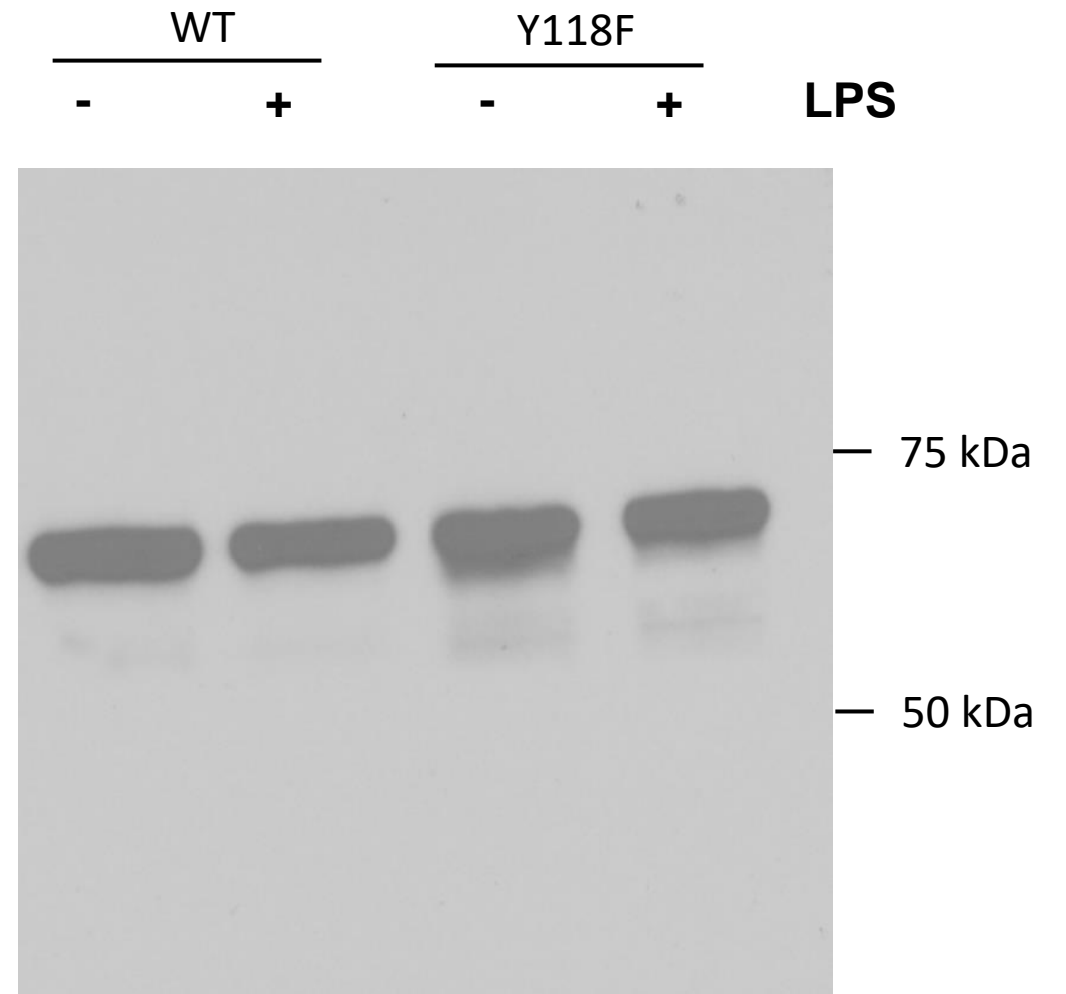

**Fig7E Pax**

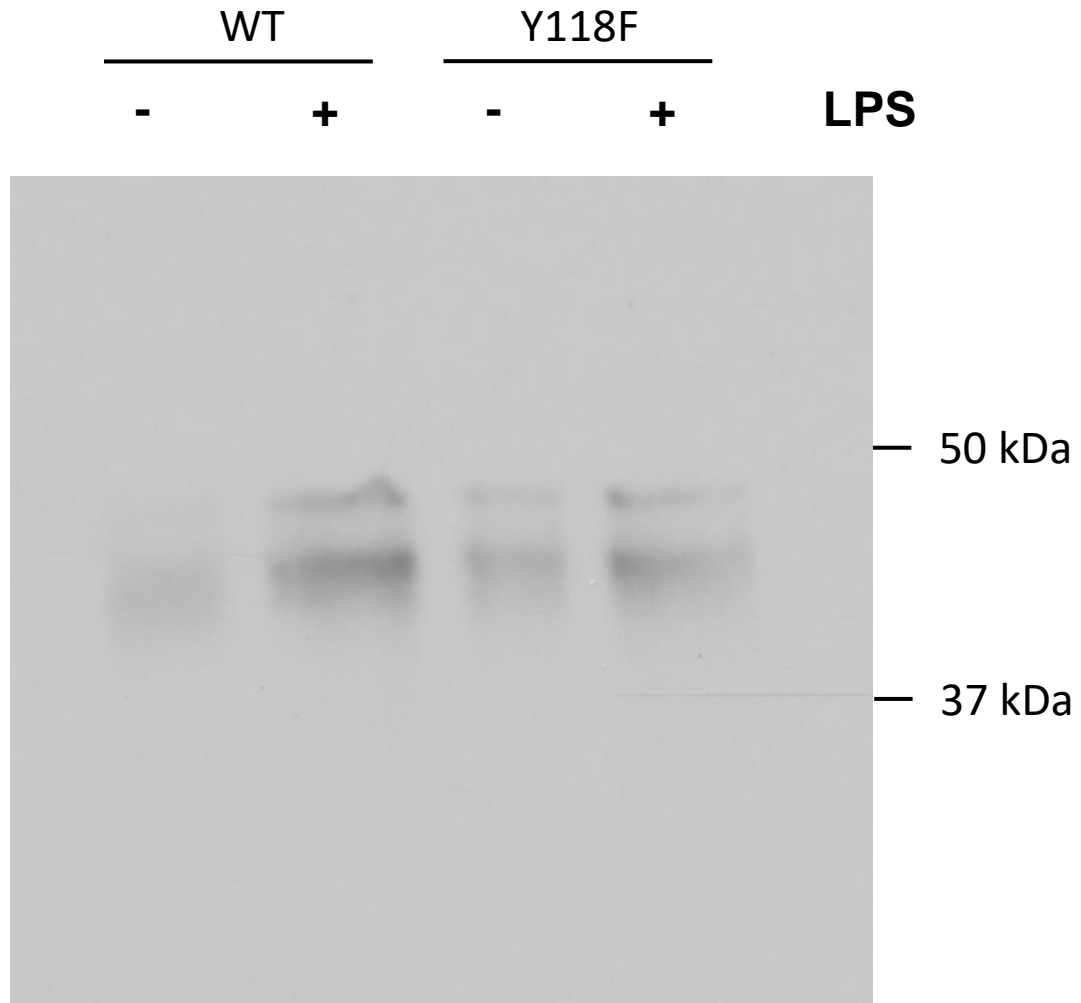

**Fig 7G Erk 1/2**

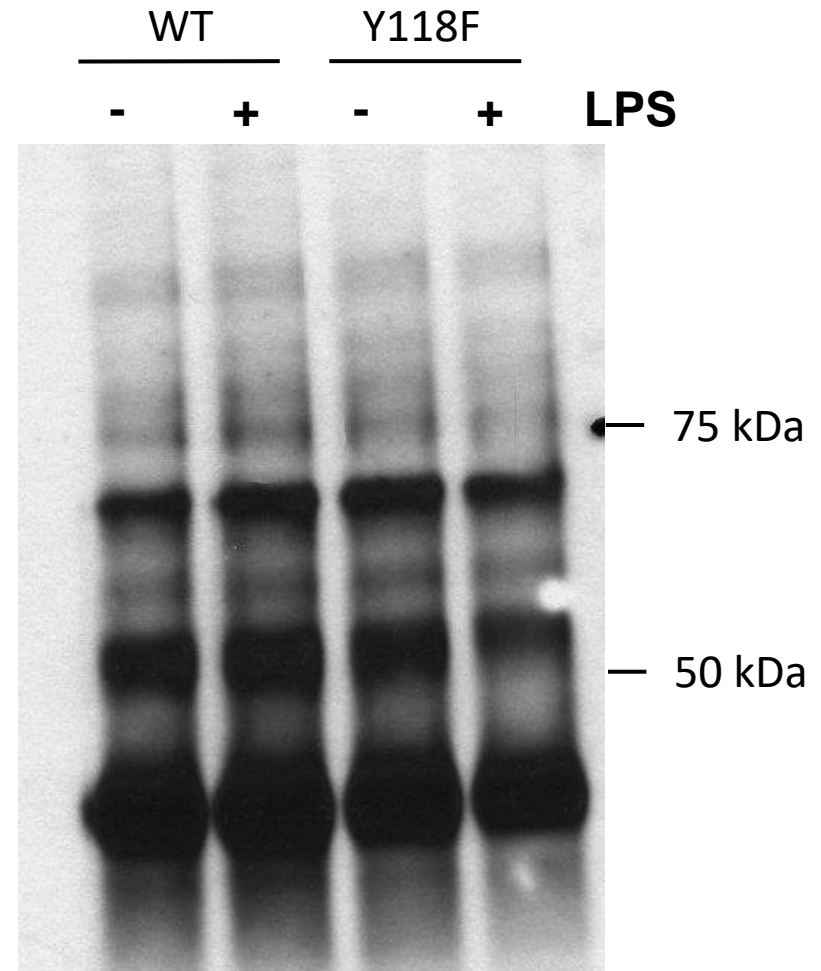

**Fig 7G Paxillin**

**Fig 8A**

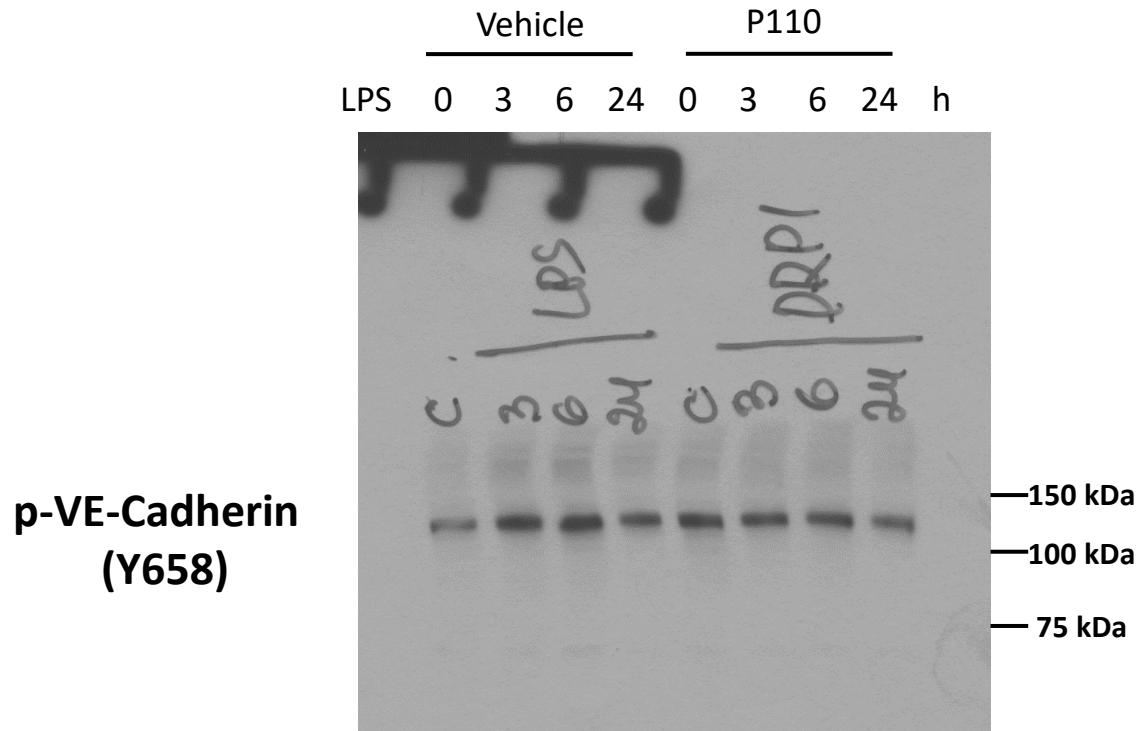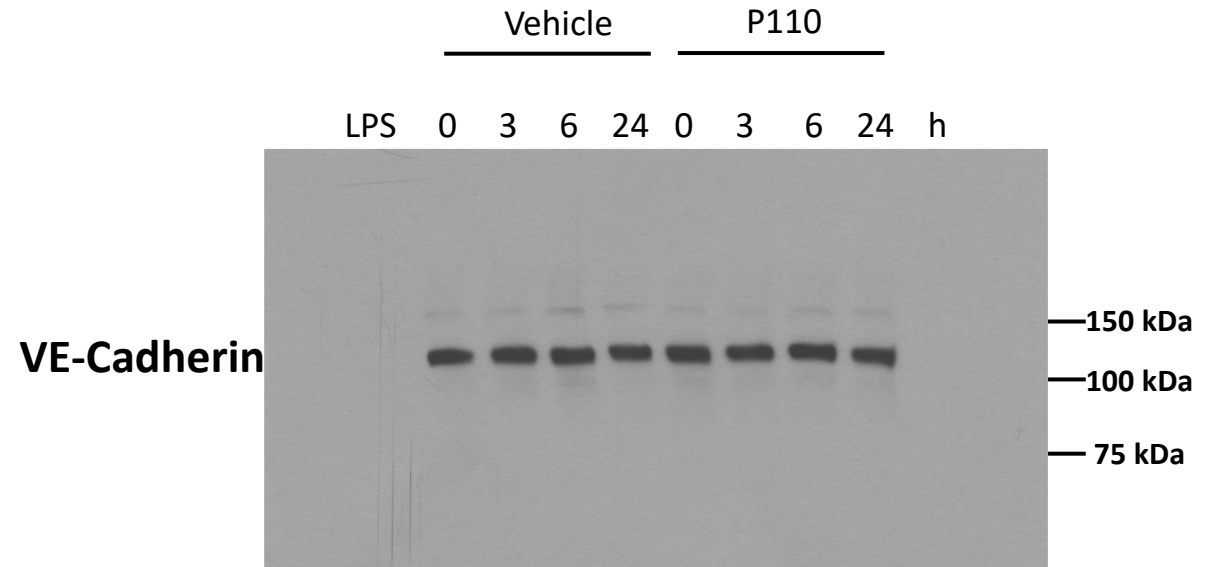

**Fig 8C**

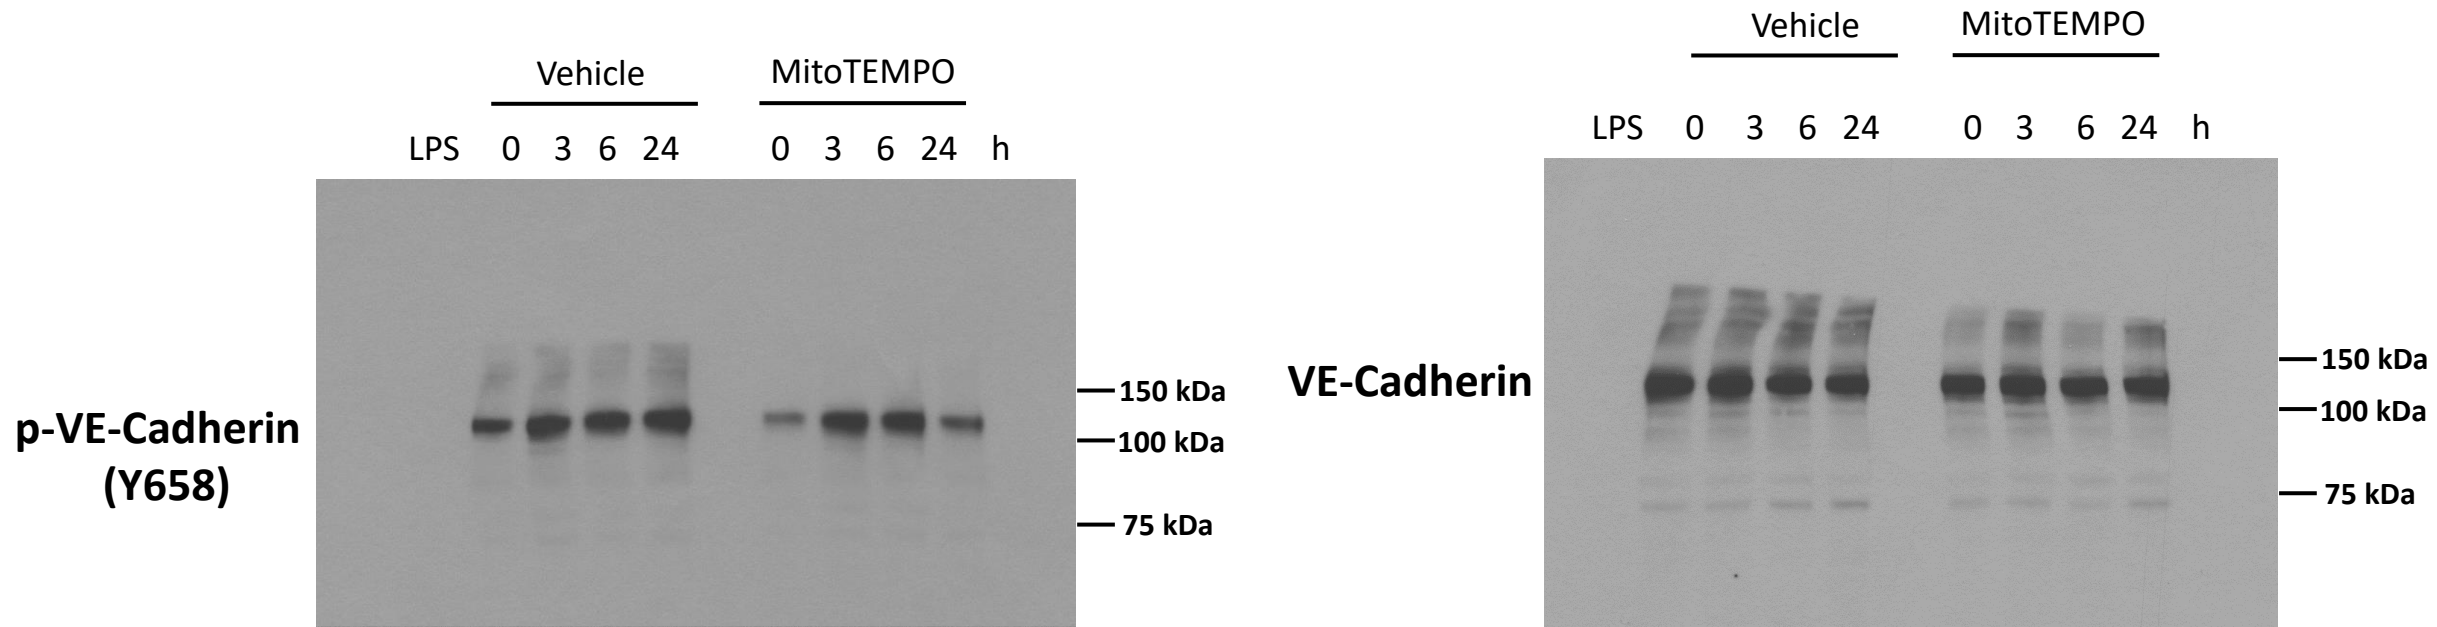

Supplement: 41598_2021_97006_MOESM1_ESM.pdf [file 41598_2021_97006_MOESM1_ESM.pdf]
